# Supplementary material for: Using a community-based participatory research approach to meaningfully engage those with lived experience of diabetes and homelessness
Source: HighWire-hosted journal article supplement (doi:10.1136/bmjdrc-2021-002154), 2021-09-01
Supplement: bmjdrc-2021-002154supp002_data_supplement.pdf [file bmjdrc-2021-002154supp002_data_supplement.pdf]

## Appendix B: Participant Feedback Survey

1. How would you rate your knowledge and understanding of diabetes **before** joining the CDAC?

- Poor
- Fair
- Good
- Very Good
- Excellent

Please describe your knowledge and understanding before joining:

---

---

2. How would you rate your knowledge and understanding of diabetes **now**?

- Poor
- Fair
- Good
- Very Good
- Excellent

Please describe your knowledge and understanding now:

---

---

3. What have you learned about diabetes that has most stood out to you the most?

---

---

4. Has your diabetes care changed in any way since joining CDAC (medication changes, connection with a family doctor or specialist, engagement with diabetes education/centre, etc)?

---

---

5. What types of skills have you learned in class? (*check all that apply*)

- Photography
- Group Work
- Research Skills
- Other

---

6. What have you liked most about being part of the CDAC?

---

---

7. What was your favourite part of the group?

---

---

8. What was your least favourite part of the group?

---

---

9. What connections have you made during this class?

- Personal
- Professional
- Other \_\_\_\_\_

10. Have you moved while being a part of this group (between Jan-July 2019)?

- Yes
- No

If yes, how many times? \_\_\_\_\_

11. Has your phone number changed while being a part of this group (between Jan-July 2019)?

- Yes
- No

12. Has your phone been disconnected or out of service for more than 24 hours while being a part of this group (between Jan-July 2019)?

- Yes
- No

13. Has your email address changed or have you lost access to your email while being a part of this group (between Jan-July 2019)?

- Yes
- No

14. How many times have you visited an emergency room to seek medical care while being a part of this group (between Jan-July 2019)

- 1  
 2  
 3  
 4  
 5 or more

15. Have you been hospitalized while being a part of this group (between Jan-July 2019)?

- Yes  
 No

If yes, how many times have you been hospitalized (between Jan-July 2019)? \_\_\_\_\_

Approximately how many days have you spent in hospital (between Jan-July 2019)? \_\_\_\_\_

16. How would you rate the following:

|                               | Poor                     | Fair                     | Good                     | Very Good                | Excellent                |
|-------------------------------|--------------------------|--------------------------|--------------------------|--------------------------|--------------------------|
| Location of the group         | <input type="checkbox"/> |
| Time of the meetings          | <input type="checkbox"/> |
| Honoraria amount              | <input type="checkbox"/> |
| Food (Quality, healthfulness) | <input type="checkbox"/> |
| Frequency of meetings         | <input type="checkbox"/> |

17. What do you think could have been done better in the group?

---



---

18. Is there one thing we could have done to substantially improve your experience?

---



---

19. Is there anything else you would like to say about your overall experience being a part of the CDAC?

---



---



---
